# Supplementary material
Source: Springer Nature journal article supplement (https://www.springermedizin.de/resource/supplementary/13058_2013_3419_MOESM4_ESM.pdf/9704106)

**A** Mammaplasty tissue dissociation → Infection → FACS sorting → Cytospin and immunostaining for ER

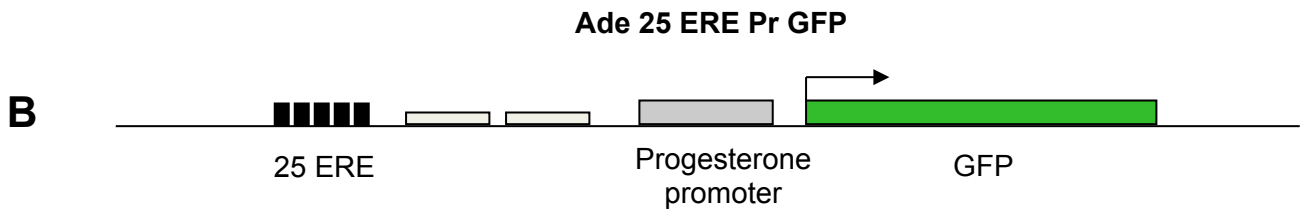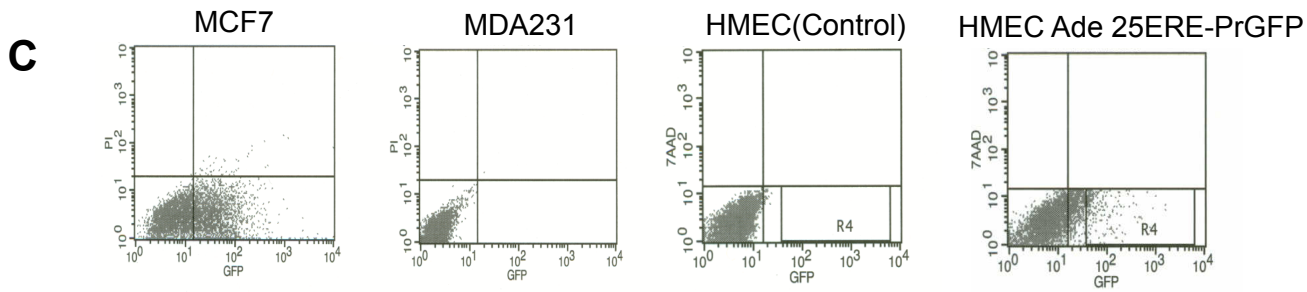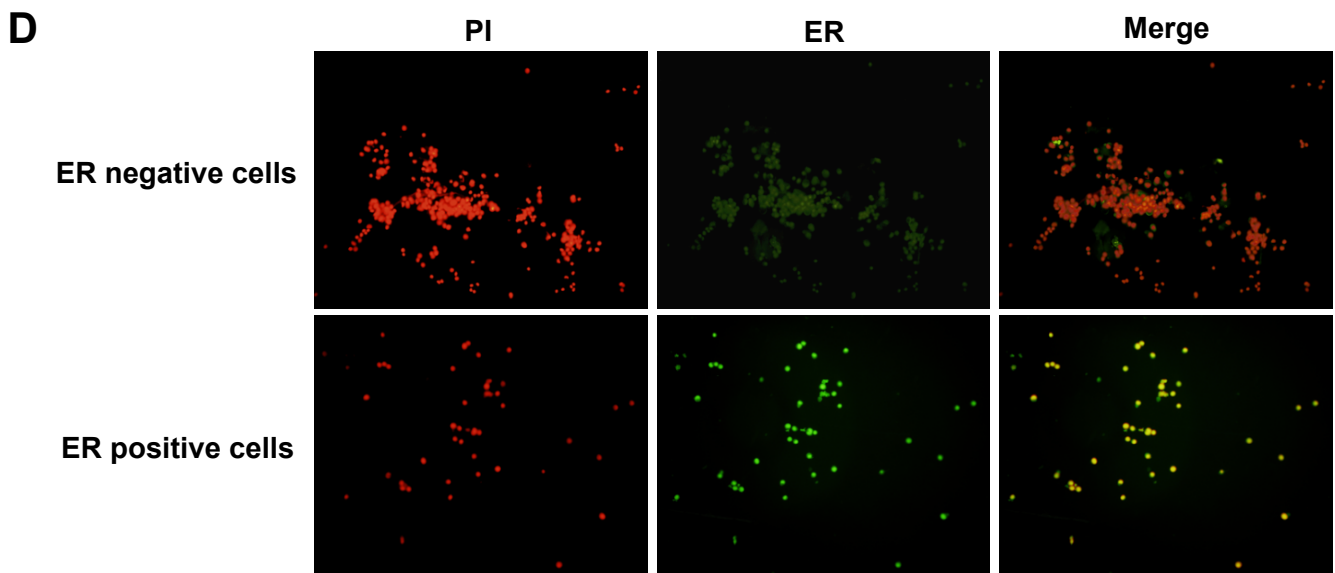

Supplement: MOESM4 [file 9704106]
